# Supplementary material
Source: PubMed Central journal article supplement (PMC4253852)

**Supplemental Fig. 1: *The pupal stage last 50 h in females*:** Female pupae were collected at 30 min intervals as they molted from fourth instar larvae into the pupal stage. The duration of the pupal stage was determined by scoring at hourly intervals the number of eclosing adults. The eclosion to adult stage began 46 h after pupation (1%), with the majority of insects emerging at 50 h (40%) and the last at 53 h (1.5%). Each data point represents the mean  $\pm$  S.E.M. of at least three independent determinations.

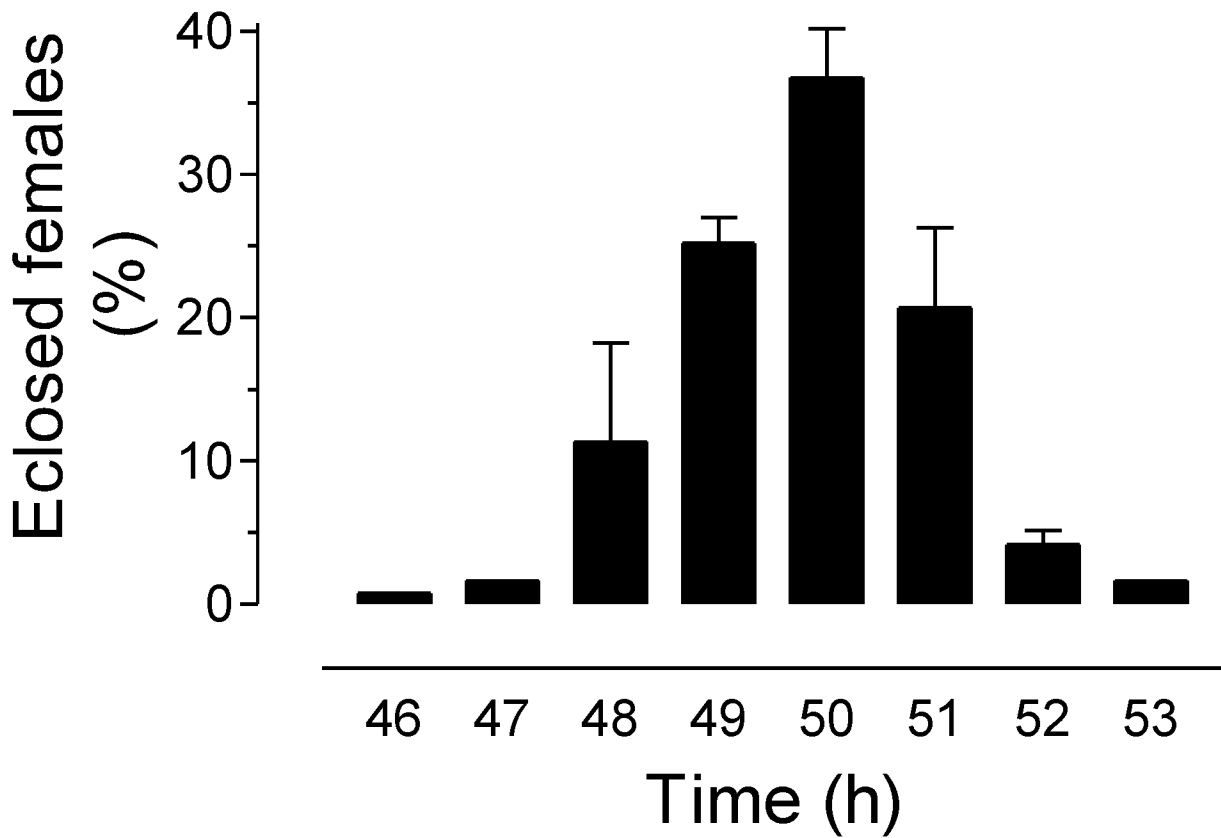

Supplement: NIHMS631142-supplement-6.pdf [file NIHMS631142-supplement-6.pdf]
