# Supplementary material
Source: PubMed Central journal article supplement (PMC4253852)

**Supplemental Fig. 2:** The effects of increasing concentrations of *Aea*ETH1 on JH synthesis were tested on BR-CA-CC complexes dissected from -2 h pupa. A series of ETH1 concentrations from  $10^{-6}$  to  $10^{-12}$  M were tested using the *in vitro* JH biosynthesis assay. Each data point represents the mean  $\pm$  S.E.M of two independent biological replicates. Statistical analyses were performed using the GraphPad Prism Software (San Diego, CA, USA). The results are expressed as means  $\pm$  S.E.M. Significant differences ( $p < 0.05$ ) were determined by one-way ANOVA followed by Tukey's test.

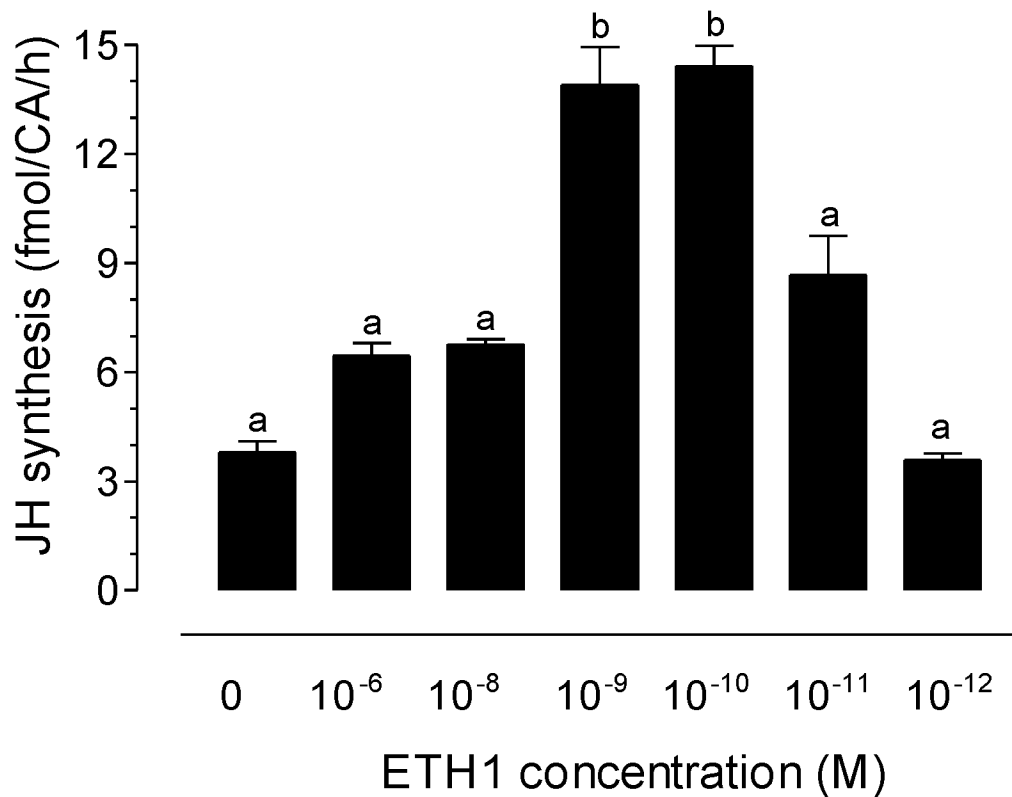

Supplement: NIHMS631142-supplement-7.pdf [file NIHMS631142-supplement-7.pdf]
