# Supplementary material
Source: PubMed Central journal article supplement (PMC4253852)

**Supplemental Fig. 3:** Juvenile hormone acid methyltransferase mRNA levels dramatically increased during the last 4 hours in pharate adults. Transcript levels were measured by Quantitative Real-Time PCR. Reactions were run in triplicate in a 20  $\mu$ l volume and normalized to the house keeping gene 60S ribosomal protein L32 (rpL32) mRNA expression for each sample. Each data point represents the mean  $\pm$  S.E.M. of two independent determination of 20 CA-CC complexes. Statistical analyses were performed using the GraphPad Prism Software (San Diego, CA, USA). The results are expressed as means  $\pm$  S.E.M. Significant differences ( $p < 0.05$ ) were determined by one-way ANOVA followed by Tukey's test.

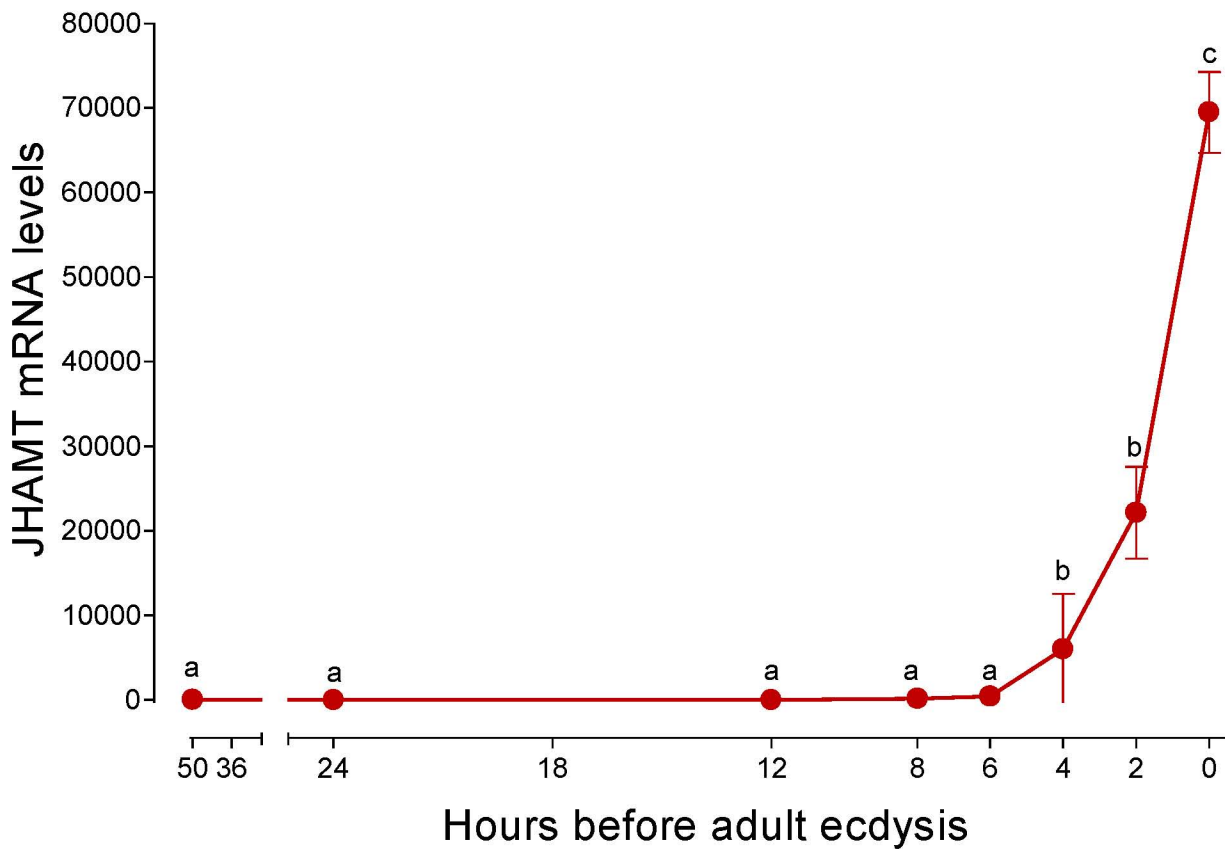

Supplement: NIHMS631142-supplement-8.pdf [file NIHMS631142-supplement-8.pdf]
