# Supplementary material
Source: PubMed Central journal article supplement (PMC4253852)

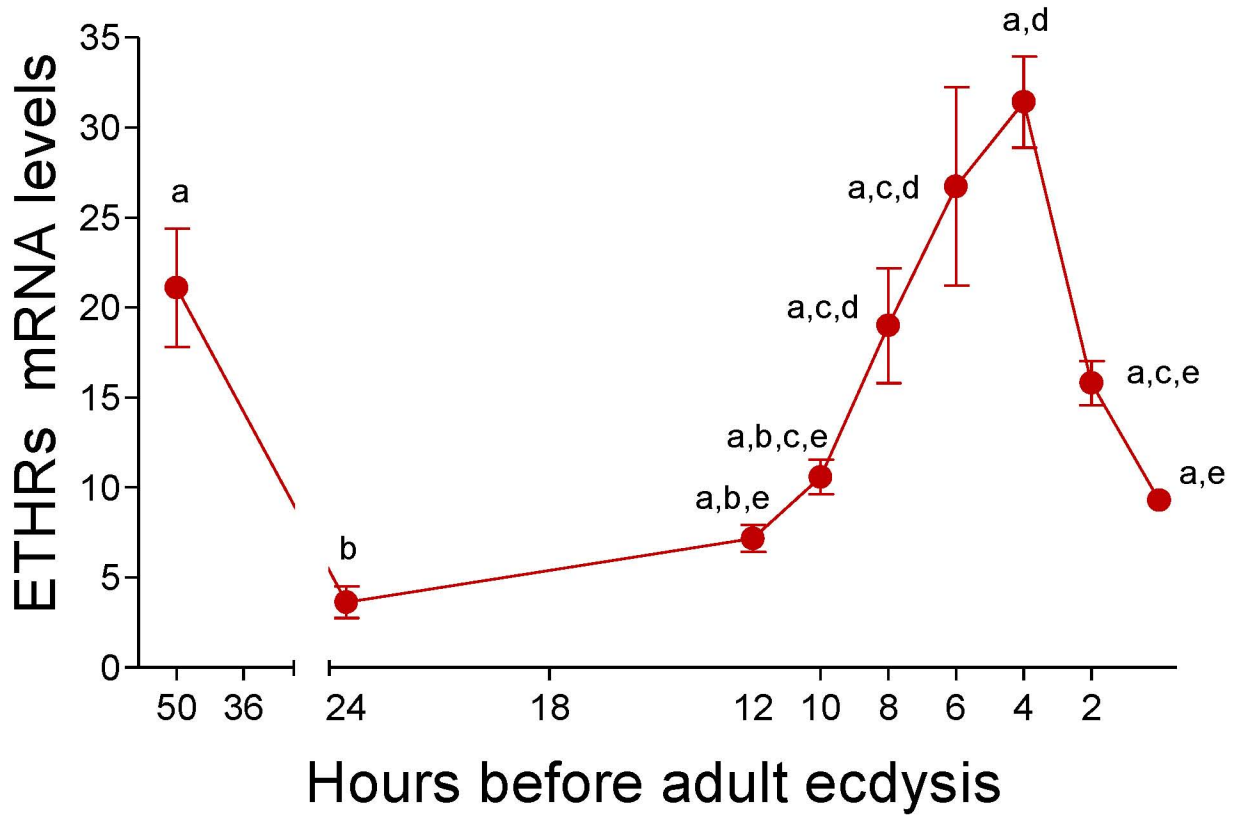

Supplement: NIHMS631142-supplement-2.pdf [file NIHMS631142-supplement-2.pdf]

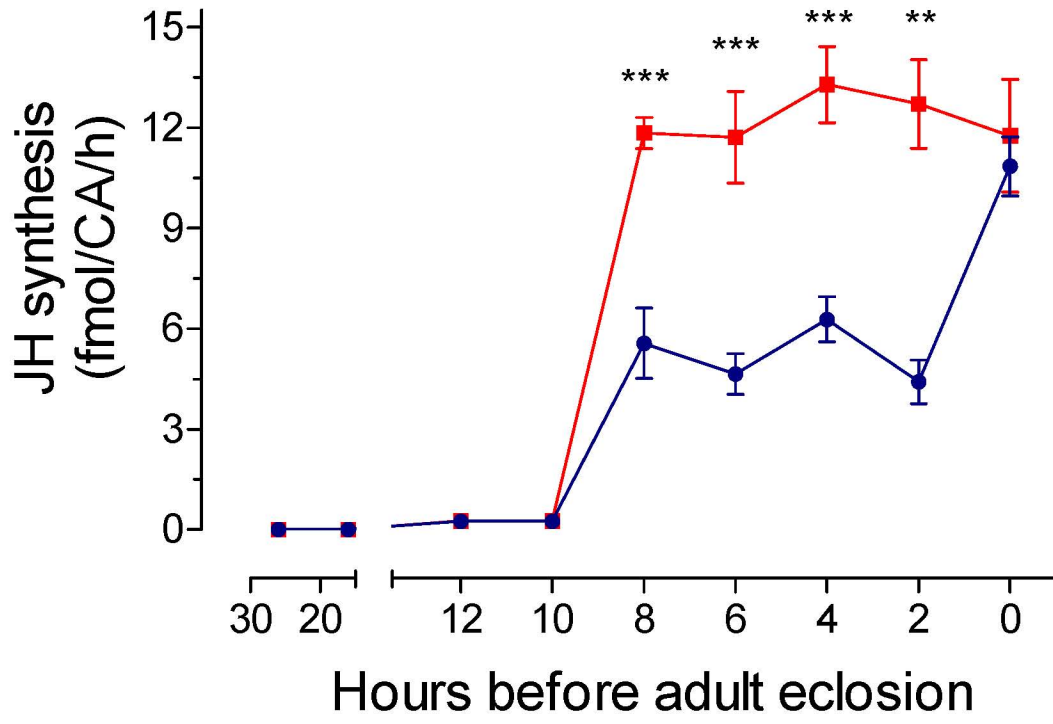

Supplement: NIHMS631142-supplement-3.pdf [file NIHMS631142-supplement-3.pdf]
